# Supplementary material for: Oxidation mechanism of diethyl ether: a complex process for a simple molecule
Source: Royal Society of Chemistry journal article supplement (doi:10.1039/c1cp21357a), 2011-01-01

# **Oxidation mechanism of diethyl ether: a complex process for a simple molecule**

Stefania Di Tommaso, Patricia Rotureau, Orlando Crescenzi, Carlo Adamo

## **Contents**

- 1) Comments on the initiation step
- 2) Figure S1
- 3) Figure S2
- 4) Figure S3
- 5) Figure S4
- 6) Figure S5
- 7) Figure S6
- 8) Figure S7

### S1. Comments on the initiation step

Different mechanisms have been proposed in literature for the autoxidation process of DEE. In particular the initiation step has been the object of a lot of experimental and theoretical studies. Clover<sup>1</sup>, for instance, in his experimental work, has assumed that the initiator of the process is the molecular oxygen which gets into a C-H bond of one methylene group to produce the CH<sub>3</sub>CH<sub>2</sub>OCH(OOH)CH<sub>3</sub> hydroperoxide (**a**).

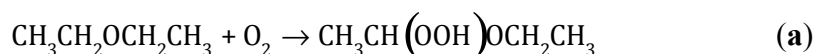

In the same years, Wieland and Wingler<sup>2</sup> have postulated that the DEE autoxidation process begins with dehydration (**b**) of the ether to vinyl ethers with formation of hydrogen peroxide. Some others studies in literature have also proposed that, in a different way, the molecular oxygen is the initiator of the process<sup>3, 4</sup> (**c**). It has also been suggested that O<sub>2</sub> abstracts an hydrogen atom from a methylene group of solvent to produce the radicals CH<sub>3</sub>CH<sub>2</sub>OĊHCH<sub>3</sub> and ·HO<sub>2</sub>. Lemay<sup>3</sup> in particular has suggested that the radical ·HO<sub>2</sub> can also act as initiator (**d**). More recently, as already done in numerous experimental works concerning the kinetics of ethers decomposition in atmosphere<sup>5, 6</sup>, Galano and co.<sup>7</sup> have investigated, at DFT theoretical level, the initiation of the decomposition process of a series of aliphatic ethers. They have proposed like Andersen<sup>8</sup> for dimethyl ether, that the initiator of the atmospherical ethers autoxidation process is the hydroxyl radical (**e**).

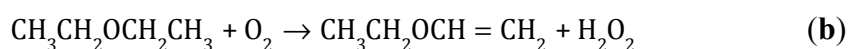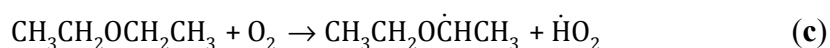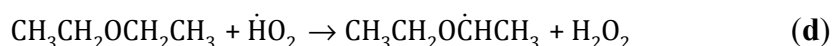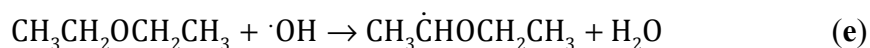

DFT calculations on the four reactions (**b-e**) described above, have given the results depicted in figure S3. It seems evident that OH radical is the most efficient among the initiators of the chain process explored (**e** reaction is exothermic and barrier less). The three other reactions are in fact all endothermic (from 4.5 kcal/mol (**b**) to 43.0 kcal/mol (**c**)) or present prohibitive activation energies (48.5 kcal/mol for reaction **c** and 43.6 kcal/mol for reaction **b**) or both.

## References

- 1 A. M. Clover, *J. Am. Chem. Soc.*, 1922, **44**, 1107-1118.
- 2 H. Wieland and A. Wingler, *Liebigs Ann. Chem.*, 1923, **431**, 317.
- 3 A. Lemay and C. Ouellet, *Can. J. Chem.*, 1955, **33**, 1316-1327.
- 4 D. J. Waddington, *Proc. R. Soc. London, Ser. A*, 1959, **252**, 260-272.
- 5 F. P. Tully and A. T. Droege, *Int. J. of Chem. Kinet.*, 1987, **19**, 251-259.
- 6 A. Mellouki, S. Teton and G. Lebras, *Int. J. Chem. Kinet.*, 1995, **27**, 791-805.
- 7 C. Zavala-Oseguera, J. R. Alvarez-Idaboy, G. Merino and A. Galano, *J. Phys. Chem. A*, 2009, **113**, 13913-13920.
- 8 A. Andersen and E. A. Carter, *J. Phys. Chem. A*, 2003, **107**, 9463-9478.

**Figure S1.** Comparison between gas phase and solvent energetic profiles for the first step of one of the dimerization pathways. For each stationary point is noted the calculated  $\Delta\Delta E = \Delta E_{\text{gas phase}} - \Delta E_{\text{solvent}}$ .

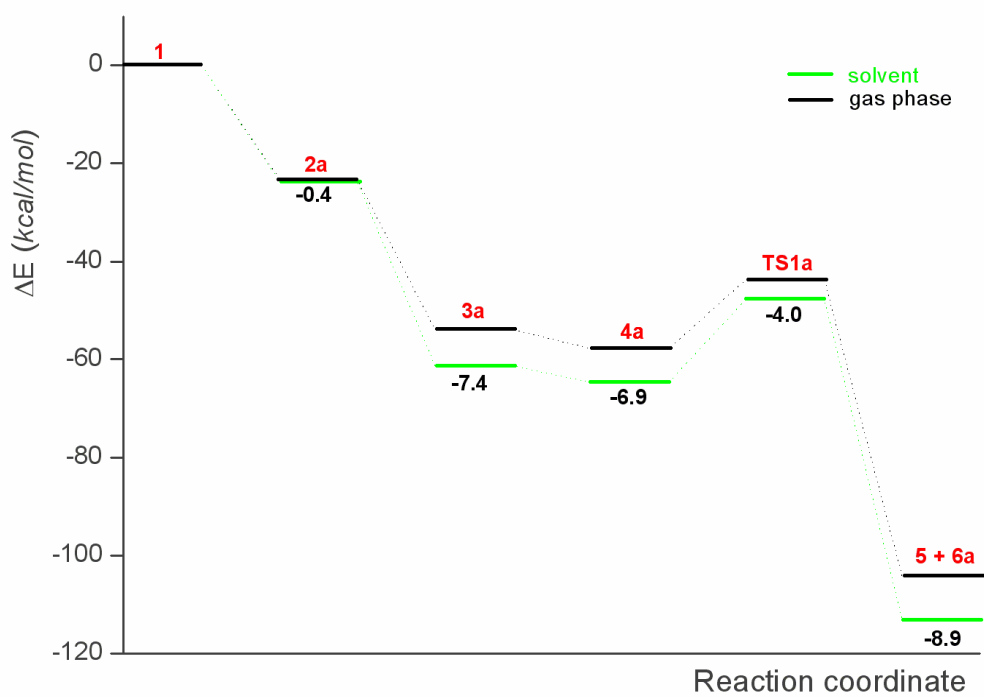

**Figure S2.** Sketch of oxidation mechanism concerning DEE radical at terminal carbon (path b) with energies ( $\Delta H$  in kcal/mol) relative to the initiation step.

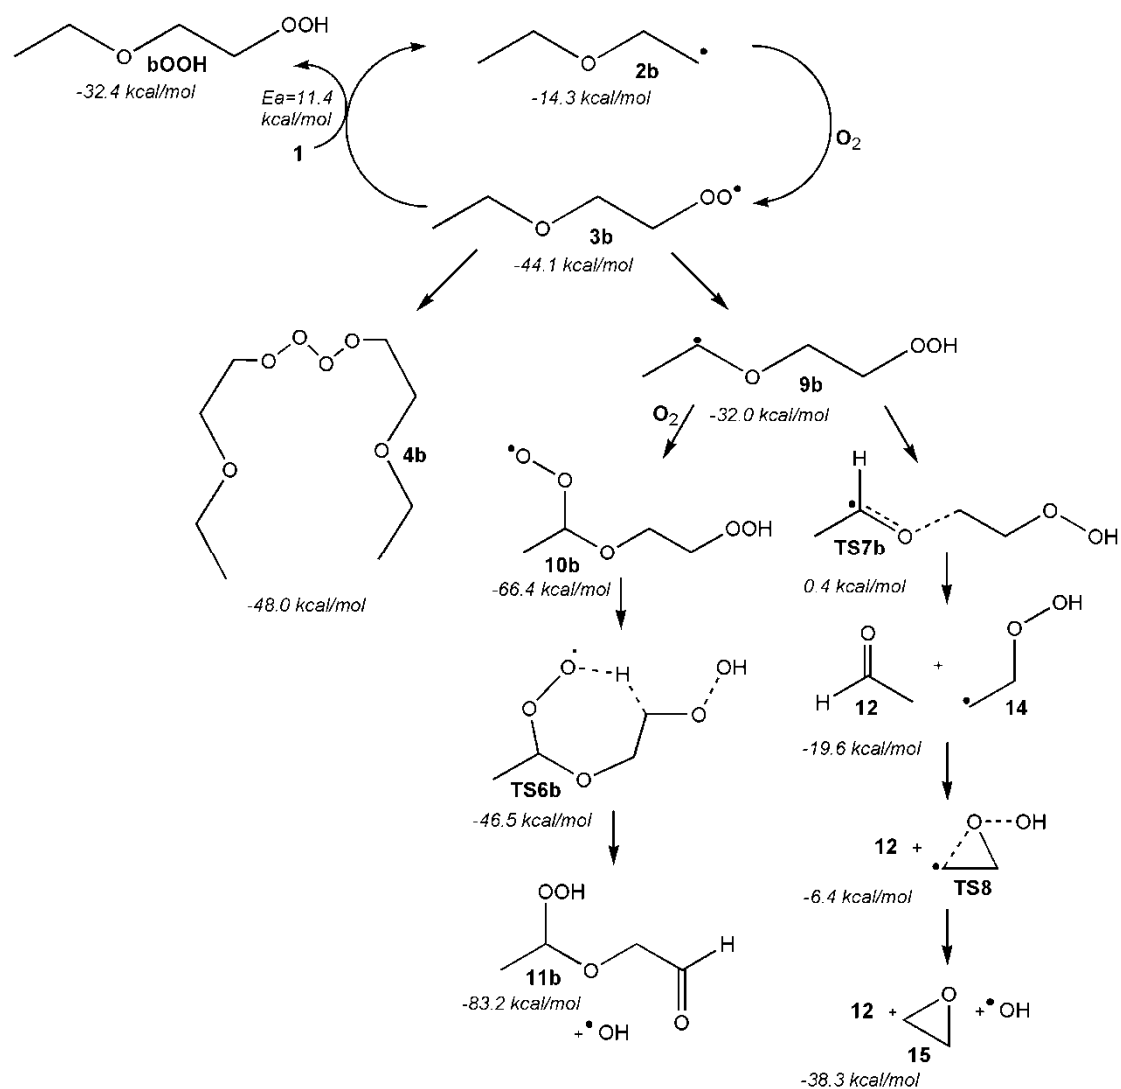

**Figure S3.** Comparison between the different initiation reactions (see paragraph S1 for labelling).

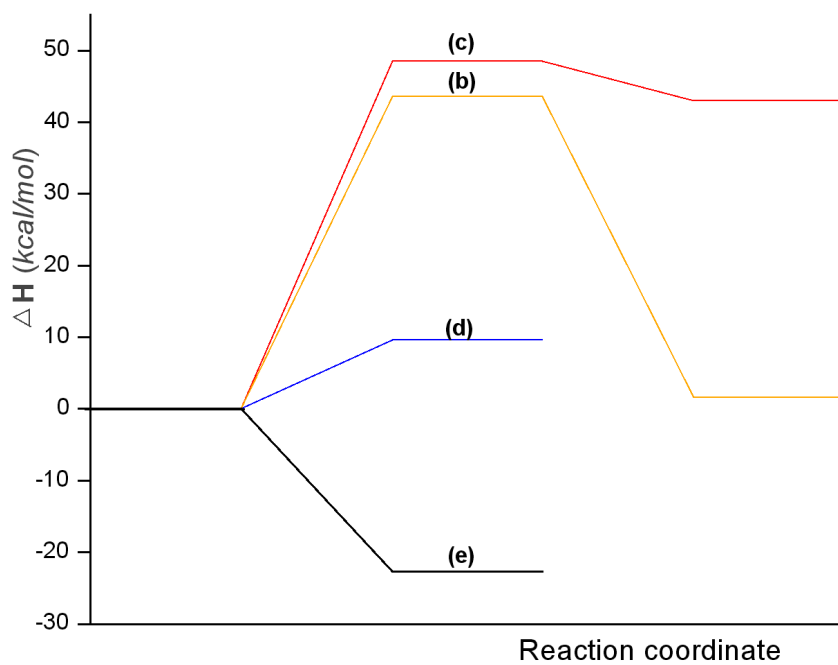

**Figure S4.** View of optimized structures of the most important minima involved in autoxidation of DEE.

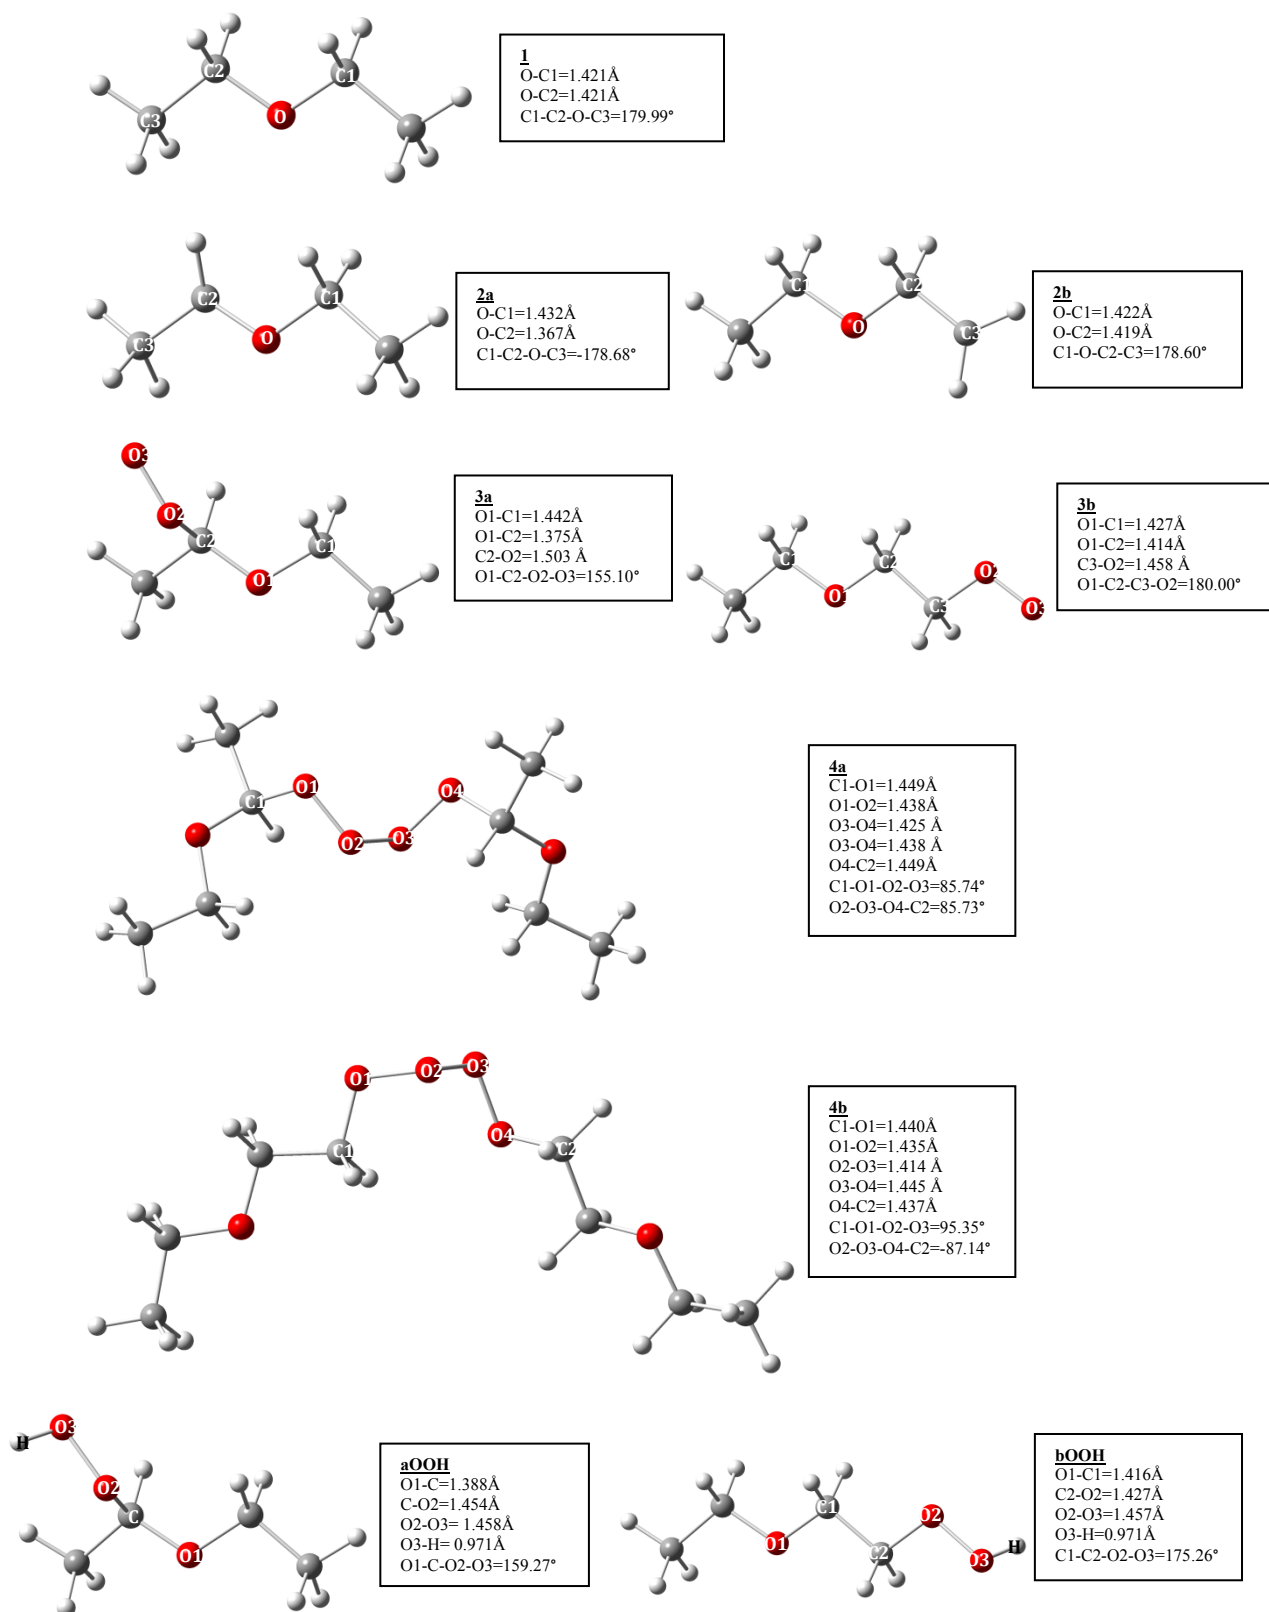

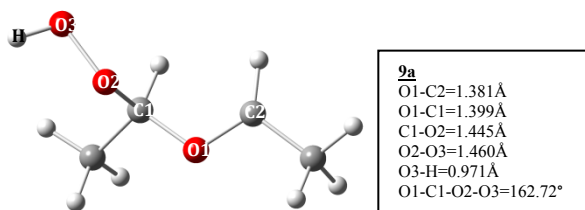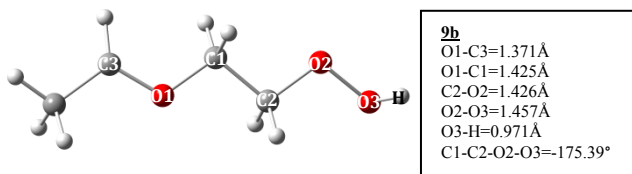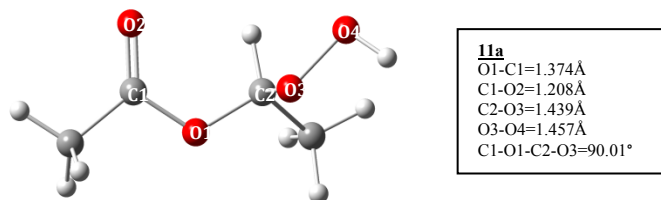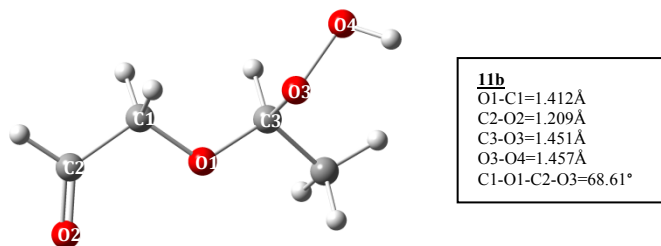



**Figure S5.** View of optimized structures of the most important transition states involved in autoxidation of DEE: path a.

**Transition states involved in 2a decomposition**

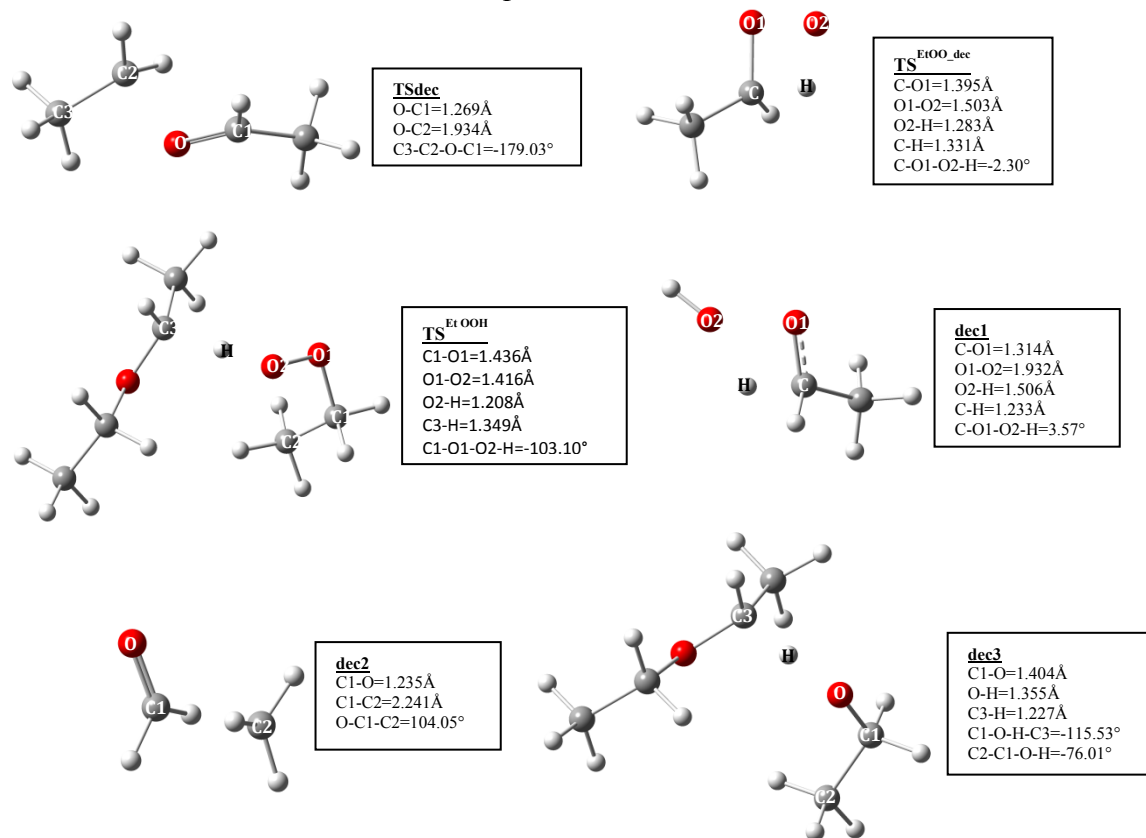

**Transition states involved in 3a dimerization reactions**

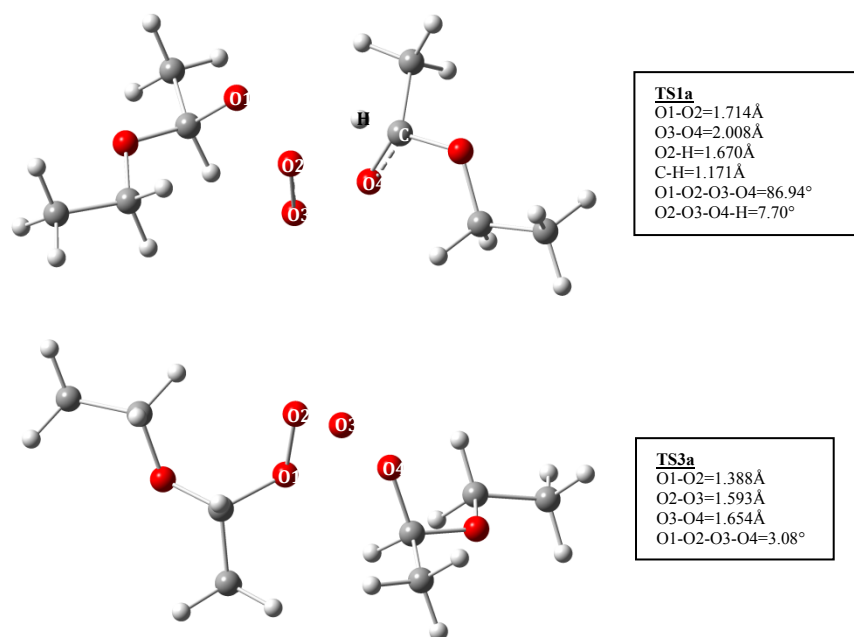

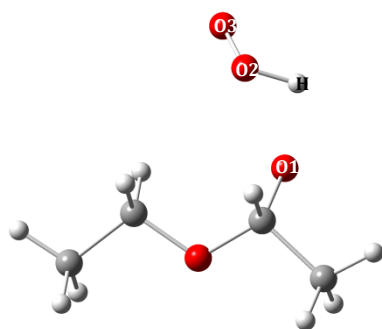

**TS2a**  
 O1-O2=2.029Å  
 O2-H=1.008Å  
 O1-H=1.608Å

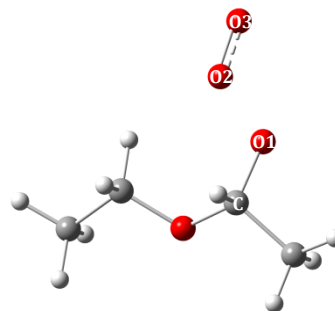

**TS4a**  
 O1-O2=1.754Å  
 O2-O3=1.220Å  
 C-O1-O2-O3=-177.29°

***Transition states and minima involved in 3a isomerization***

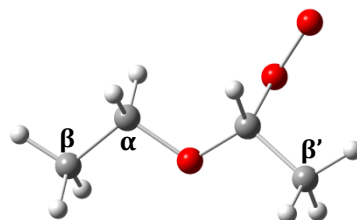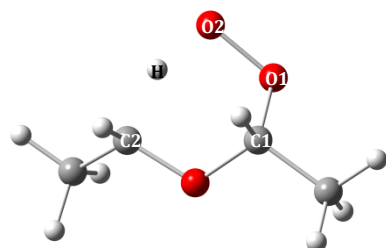

**TS5a**  
 O1-O2=1.424Å  
 O2-H=1.209Å  
 C2-H=1.364Å  
 C1-O1-O2-H=-49.12°  
 Ea= 17.2 kcal/mol

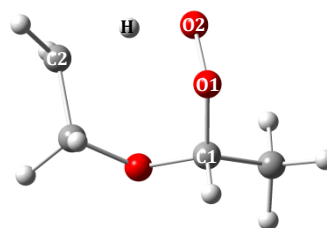

**TS5a(7)**  
 O1-O2=1.418Å  
 O2-H=1.157Å  
 C2-H=1.393Å  
 C1-O1-O2-H=79.10°  
 Ea= 25.1 kcal/mol

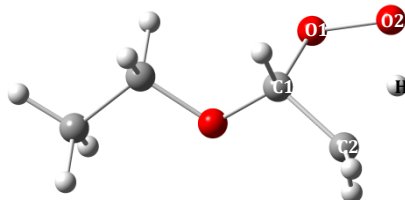

**TS5a(5)**  
 O1-O2=1.425Å  
 O2-H=1.188Å  
 C2-H=1.392Å  
 C1-O1-O2-H=31.47°  
 Ea= 36.1 kcal/mol

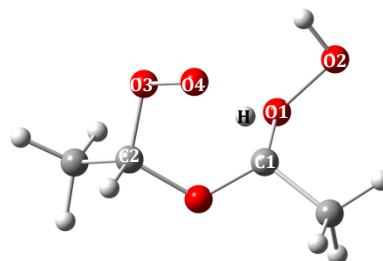

**TS6a**  
 C1-H=1.345Å  
 O4-H=1.212Å  
 O1-C1-C2-O3=-62.50°  
 C2-O3-O4-H=60.13°

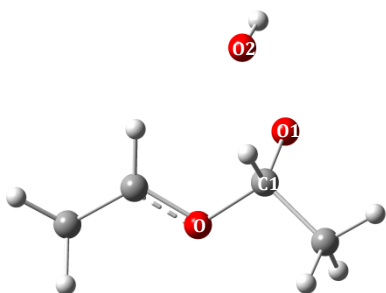

**TS7a**  
 O1-O2=1.734Å  
 O-C1=1.490Å  
 O-C1-O1-O2=94.52°

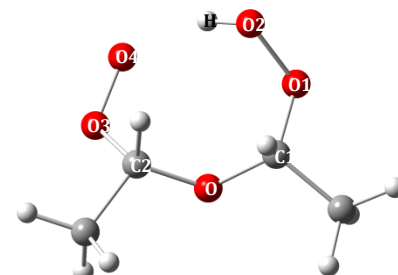

**10a(a)**  
 C1-O1=1.404Å  
 C2-O3=1.499Å  
 O2-H=0.982Å  
 O4-H=1.877Å  
 O1-C1-C2-O3=29.72°

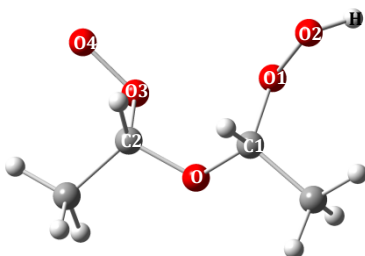

**10a(b)**  
 C1-O1=1.438Å  
 C2-O3=1.487Å  
 O2-H=0.971Å  
 O1-C1-C2-O3=21.04°

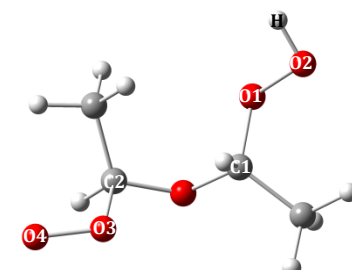

**10a(c)**  
 C1-O1=1.445Å  
 C2-O3=1.494Å  
 O2-H=0.971Å  
 O1-C1-C2-O3=-149.95°

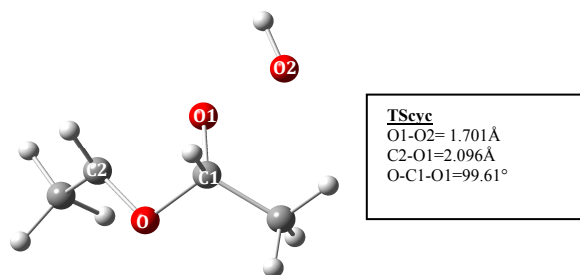

***Transition states and minima involved in 11a decomposition reactions***

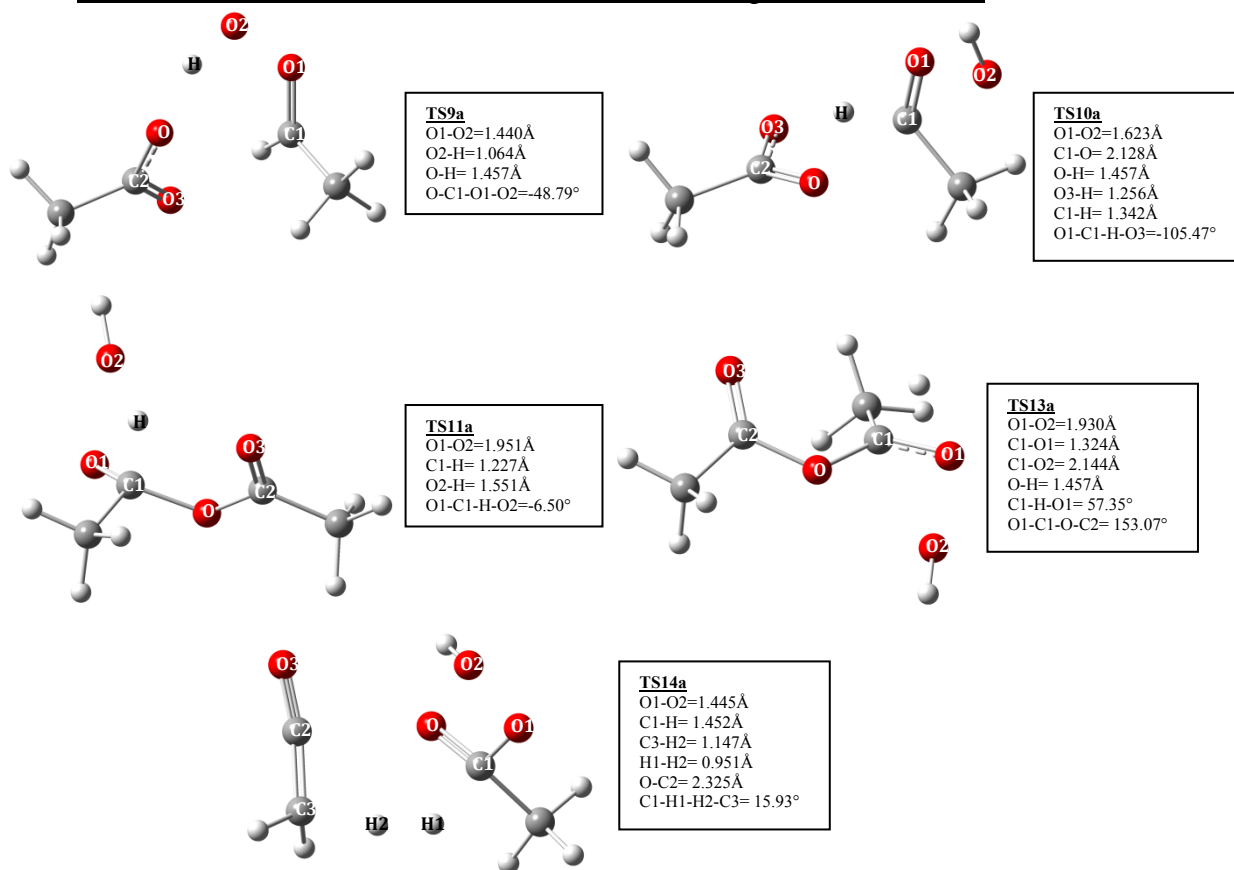

***Transition states and minima involved in  $\alpha$ OOH decomposition reactions***

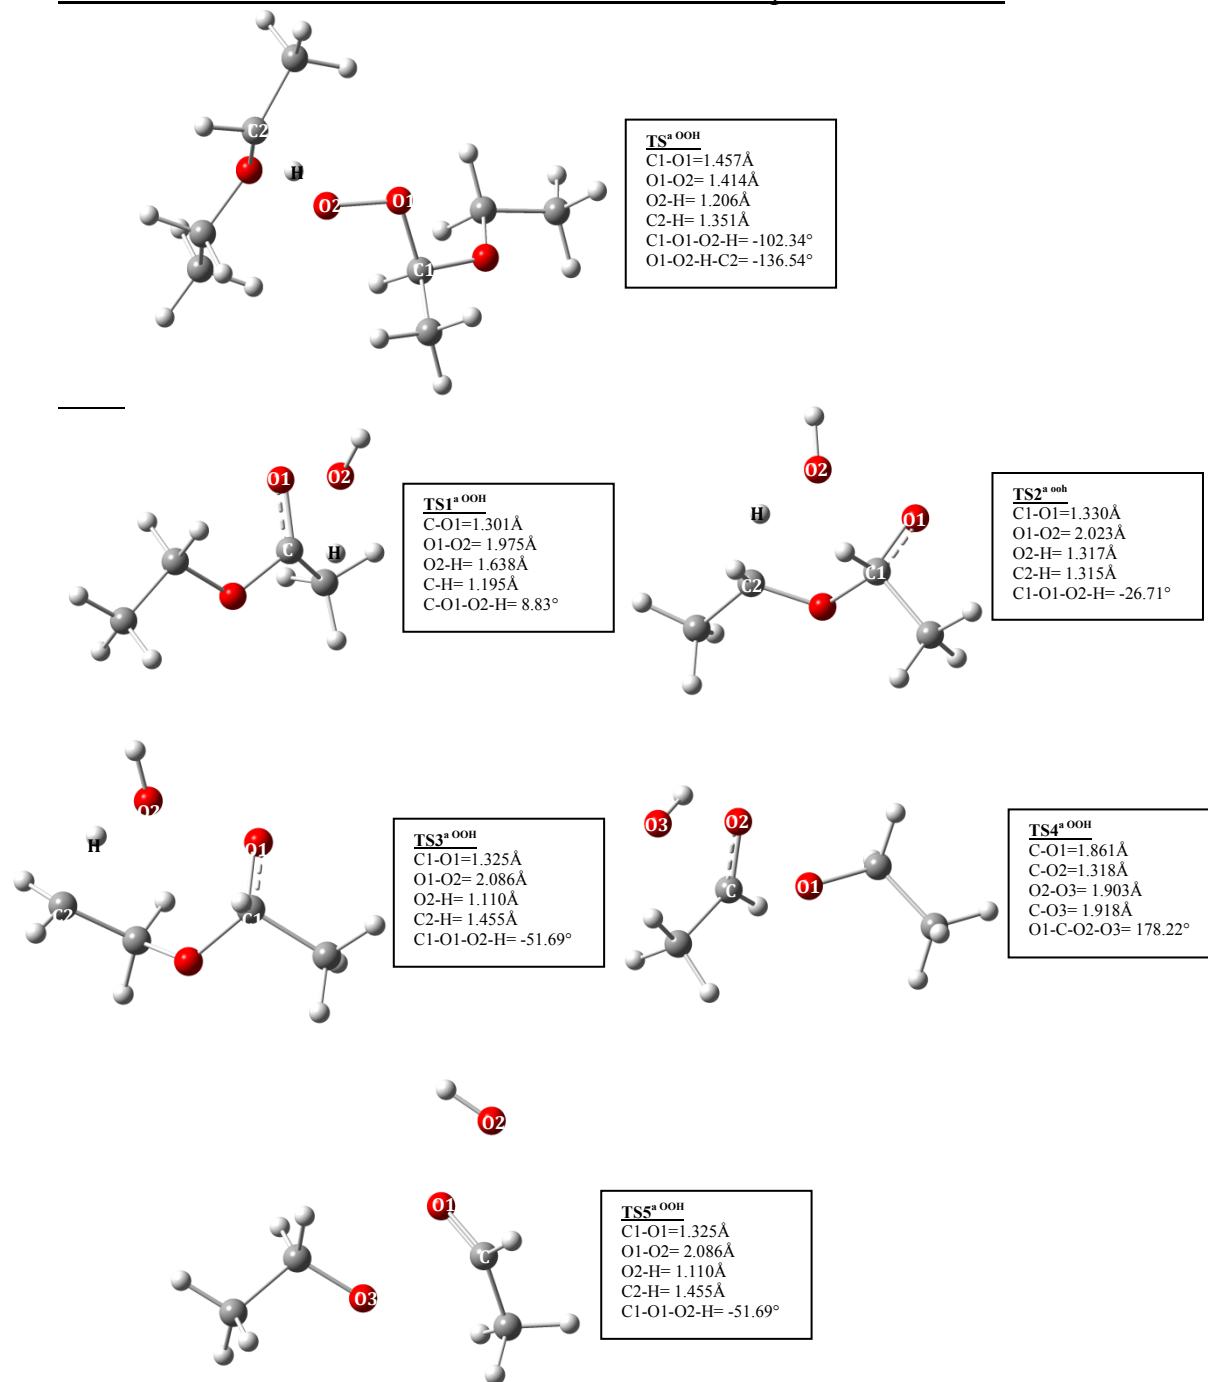

**Figure S6.** Relative enthalpies of **3b** dimerization reactions I (purple) and II (orange).

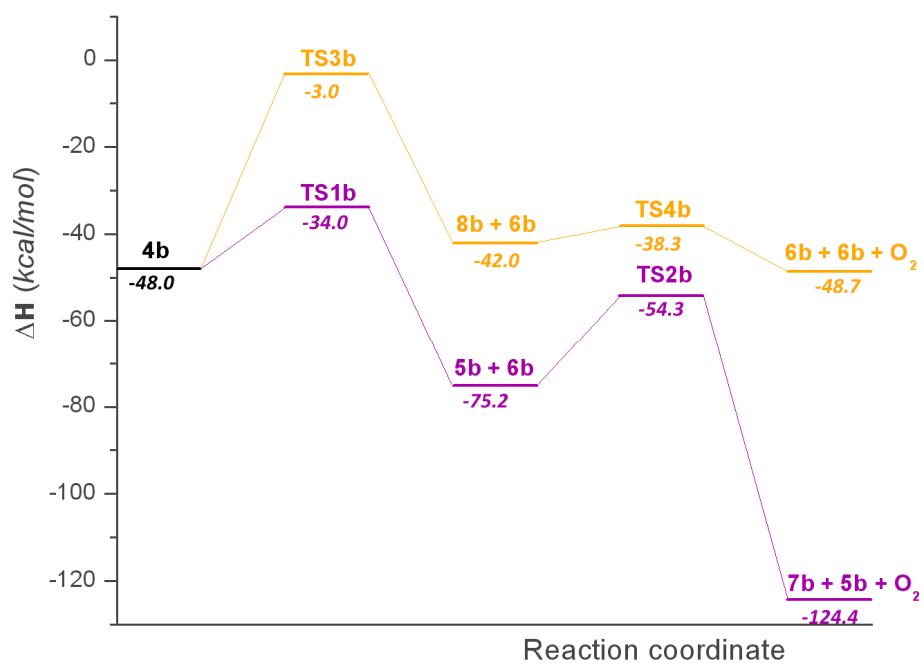

**Figure S7.** View of optimized structures of the most important transition states involved in autoxidation of DEE: path b.

***Transition states involved in 3b dimerizations***

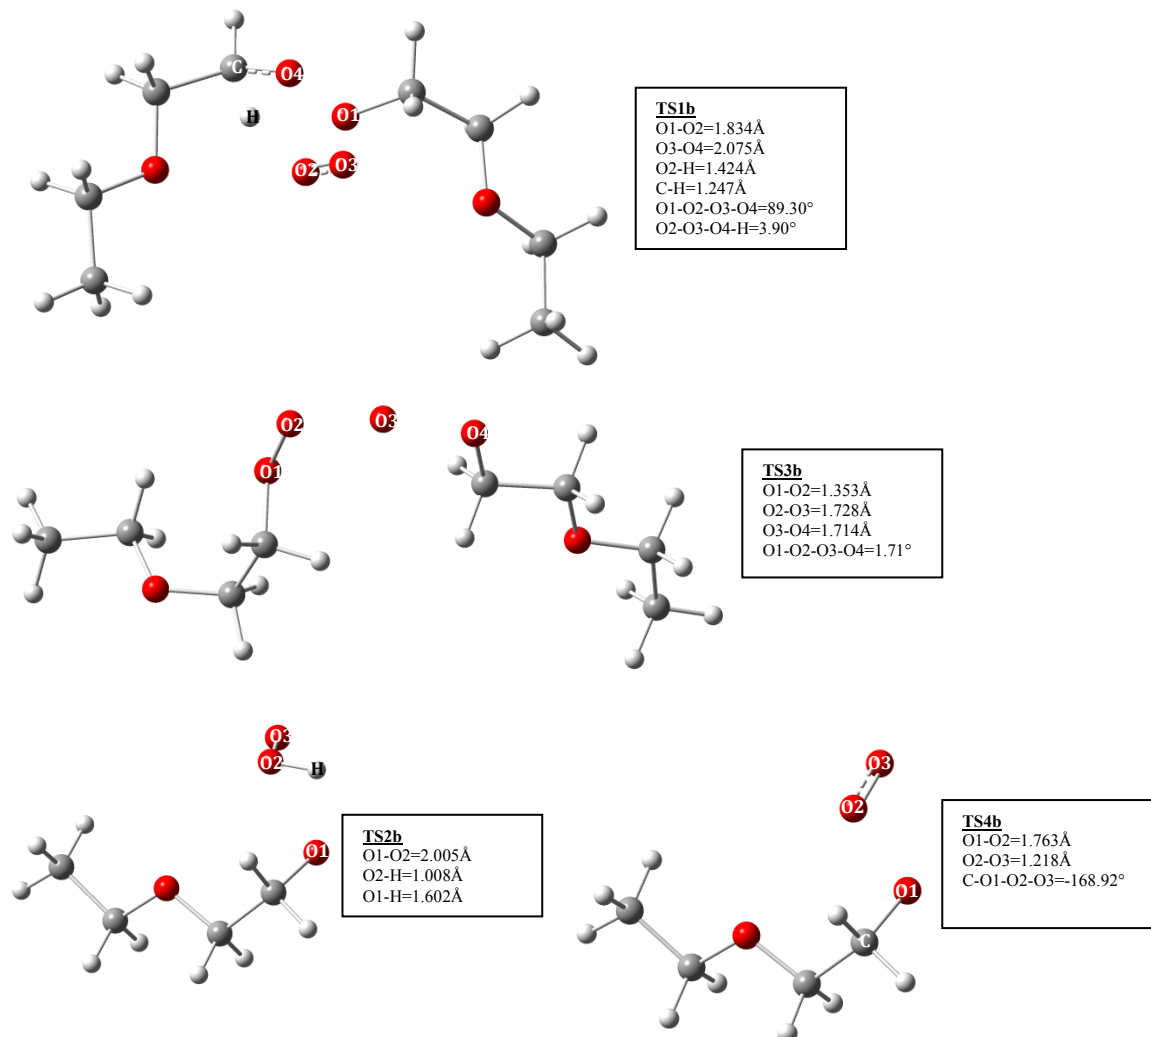

***Transition states and minima involved in 3b isomerization***

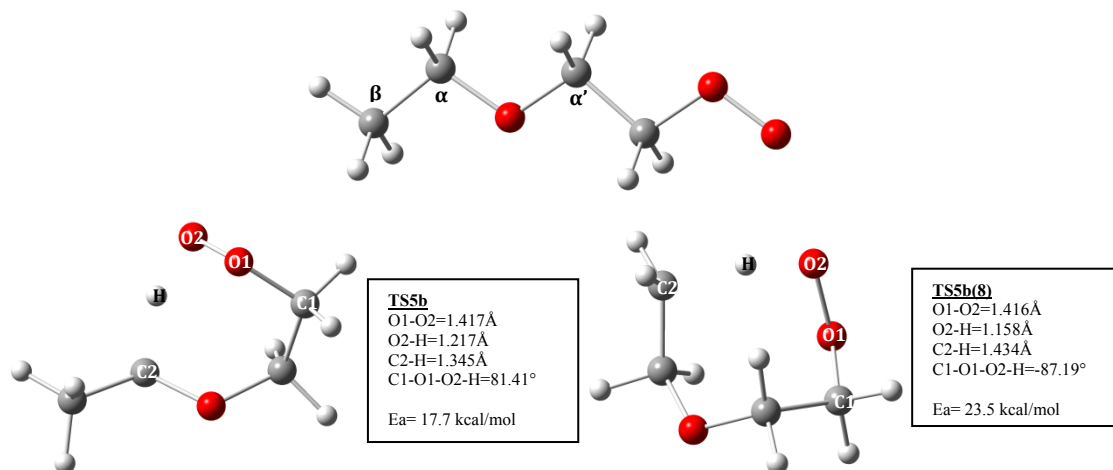

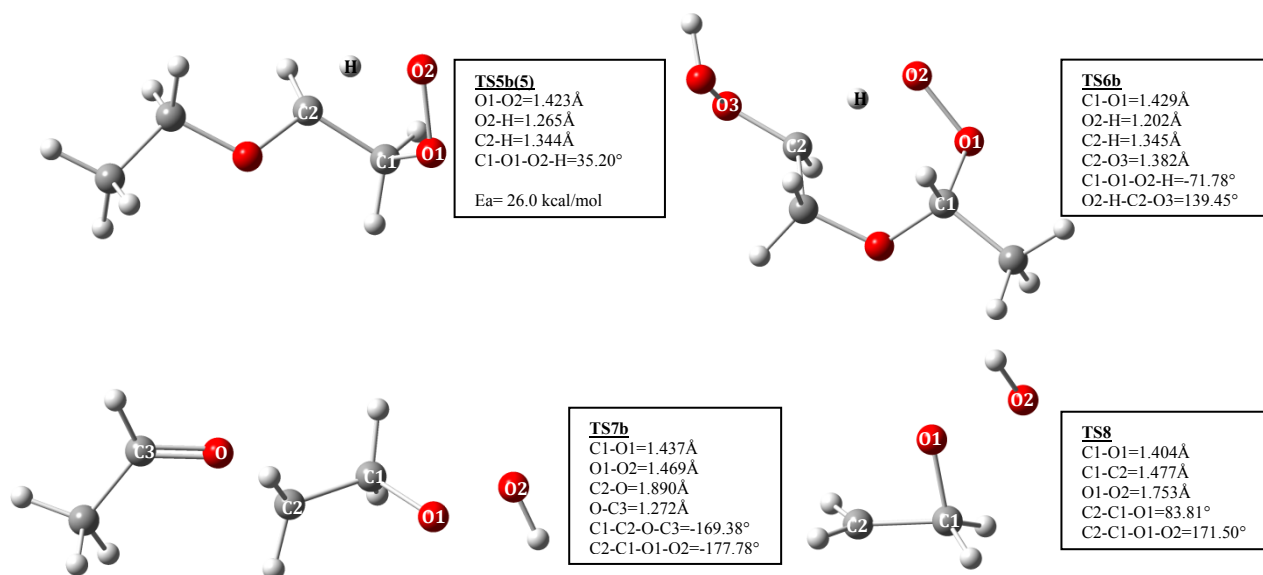

***Transition state involved in bOOH production***

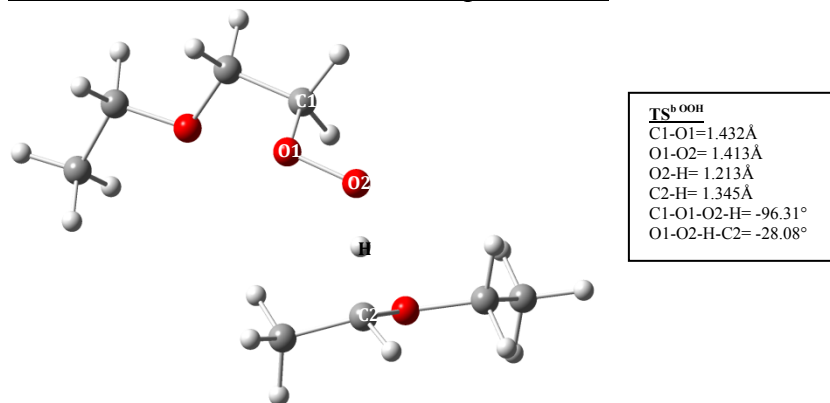

Supplement: c1cp21357a.pdf [file c1cp21357a.pdf]
